# Supplementary material for: Dietary Patterns of Children and Adolescents from High, Medium and Low Human Development Countries and Associated Socioeconomic Factors: A Systematic Review
Source: Nutrients. 2018 Mar 30;10(4):436. doi: 10.3390/nu10040436 (PMC5946221; doi:10.3390/nu10040436)
Supplement: Supplementary file 1 [file nutrients-10-00436-s001.pdf]

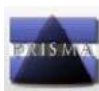

**Table S1.** PRISMA 2009 Checklist.

| Section/topic             | # | Checklist item                                                                                                                                                                                                                                                                                              | Reported on page #                             |
|---------------------------|---|-------------------------------------------------------------------------------------------------------------------------------------------------------------------------------------------------------------------------------------------------------------------------------------------------------------|------------------------------------------------|
| <b>TITLE</b>              |   |                                                                                                                                                                                                                                                                                                             |                                                |
| Title                     | 1 | Identify the report as a systematic review, meta-analysis, or both.                                                                                                                                                                                                                                         | 1                                              |
| <b>ABSTRACT</b>           |   |                                                                                                                                                                                                                                                                                                             |                                                |
| Structured summary        | 2 | Provide a structured summary including, as applicable: background; objectives; data sources; study eligibility criteria, participants, and interventions; study appraisal and synthesis methods; results; limitations; conclusions and implications of key findings; systematic review registration number. | 1                                              |
| <b>INTRODUCTION</b>       |   |                                                                                                                                                                                                                                                                                                             |                                                |
| Rationale                 | 3 | Describe the rationale for the review in the context of what is already known.                                                                                                                                                                                                                              | 2                                              |
| Objectives                | 4 | Provide an explicit statement of questions being addressed with reference to participants, interventions, comparisons, outcomes, and study design (PICOS).                                                                                                                                                  | 2                                              |
| <b>METHODS</b>            |   |                                                                                                                                                                                                                                                                                                             |                                                |
| Protocol and registration | 5 | Indicate if a review protocol exists, if and where it can be accessed (e.g., Web address), and, if available, provide registration information including registration number.                                                                                                                               | 2                                              |
| Eligibility criteria      | 6 | Specify study characteristics (e.g., PICOS, length of follow-up) and report characteristics (e.g., years considered, language, publication status) used as criteria for eligibility, giving rationale.                                                                                                      | Implied in<br>“Inclusion Criteria”<br>(page 3) |
| Information sources       | 7 | Describe all information sources (e.g., databases with dates of coverage, contact with study authors to identify additional studies) in the search and date last searched.                                                                                                                                  | 4 and Figure 1                                 |
| Search                    | 8 | Present full electronic search strategy for at least one database, including any limits used, such that it could be repeated.                                                                                                                                                                               | Online<br>Supplemental                         |

|                                    |    |                                                                                                                                                                                                                        |                                                              |
|------------------------------------|----|------------------------------------------------------------------------------------------------------------------------------------------------------------------------------------------------------------------------|--------------------------------------------------------------|
|                                    |    |                                                                                                                                                                                                                        | Material 1                                                   |
| Study selection                    | 9  | State the process for selecting studies (i.e., screening, eligibility, included in systematic review, and, if applicable, included in the meta-analysis).                                                              | Implied in “Study selection” (page 3)                        |
| Data collection process            | 10 | Describe method of data extraction from reports (e.g., piloted forms, independently, in duplicate) and any processes for obtaining and confirming data from investigators.                                             | 3,4                                                          |
| Data items                         | 11 | List and define all variables for which data were sought (e.g., PICOS, funding sources) and any assumptions and simplifications made.                                                                                  | 3,4                                                          |
| Risk of bias in individual studies | 12 | Describe methods used for assessing risk of bias of individual studies (including specification of whether this was done at the study or outcome level), and how this information is to be used in any data synthesis. | Implied in “Risk of bias within individual studies” (page 5) |
| Summary measures                   | 13 | State the principal summary measures (e.g., risk ratio, difference in means).                                                                                                                                          | Implied in “Data items” (page 4)                             |
| Synthesis of results               | 14 | Describe the methods of handling data and combining results of studies, if done, including measures of consistency (e.g., $I^2$ ) for each meta-analysis.                                                              | Implied in “Data items” (page 4)                             |

**Table Table S1. *Cont.***

| Section/topic                 | #  | Checklist item                                                                                                                                                                                           | Reported on page #                                                                                         |
|-------------------------------|----|----------------------------------------------------------------------------------------------------------------------------------------------------------------------------------------------------------|------------------------------------------------------------------------------------------------------------|
| Risk of bias across studies   | 15 | Specify any assessment of risk of bias that may affect the cumulative evidence (e.g., publication bias, selective reporting within studies).                                                             | Implied in “Risk of bias within individual studies” (page 5)                                               |
| Additional analyses           | 16 | Describe methods of additional analyses (e.g., sensitivity or subgroup analyses, meta-regression), if done, indicating which were pre-specified.                                                         | Subgroup: HHDC, MHDC and LHDC (tables 1, 2, 3 and 4, pages 8-21 and in “Synthesis of results) – page 22-24 |
| <b>RESULTS</b>                |    |                                                                                                                                                                                                          |                                                                                                            |
| Study selection               | 17 | Give numbers of studies screened, assessed for eligibility, and included in the review, with reasons for exclusions at each stage, ideally with a flow diagram.                                          | Page 5 and Figure 1                                                                                        |
| Study characteristics         | 18 | For each study, present characteristics for which data were extracted (e.g., study size, PICOS, follow-up period) and provide the citations.                                                             | Pages 5, 22 and tables 1, 2,3                                                                              |
| Risk of bias within studies   | 19 | Present data on risk of bias of each study and, if available, any outcome level assessment (see item 12).                                                                                                | Page 22 and Online Supplemental Material 2 and 3                                                           |
| Results of individual studies | 20 | For all outcomes considered (benefits or harms), present, for each study: (a) simple summary data for each intervention group (b) effect estimates and confidence intervals, ideally with a forest plot. | Tables 1, 2 and 3                                                                                          |
| Synthesis of results          | 21 | Present results of each meta-analysis done, including confidence intervals and measures of                                                                                                               | not applicable                                                                                             |

|                             |    |                                                                                                                                                                                      |                                                  |
|-----------------------------|----|--------------------------------------------------------------------------------------------------------------------------------------------------------------------------------------|--------------------------------------------------|
|                             |    | consistency.                                                                                                                                                                         |                                                  |
| Risk of bias across studies | 22 | Present results of any assessment of risk of bias across studies (see Item 15).                                                                                                      | Page 22 and online Supplemental Material 2 and 3 |
| Additional analysis         | 23 | Give results of additional analyses, if done (e.g., sensitivity or subgroup analyses, meta-regression [see Item 16]).                                                                | Table 4                                          |
| <b>DISCUSSION</b>           |    |                                                                                                                                                                                      |                                                  |
| Summary of evidence         | 24 | Summarize the main findings including the strength of evidence for each main outcome; consider their relevance to key groups (e.g., healthcare providers, users, and policy makers). | 25                                               |
| Limitations                 | 25 | Discuss limitations at study and outcome level (e.g., risk of bias), and at review-level (e.g., incomplete retrieval of identified research, reporting bias).                        | 26 and 27                                        |
| Conclusions                 | 26 | Provide a general interpretation of the results in the context of other evidence, and implications for future research.                                                              | 25, 26 and 27                                    |
| <b>FUNDING</b>              |    |                                                                                                                                                                                      |                                                  |
| Funding                     | 27 | Describe sources of funding for the systematic review and other support (e.g., supply of data); role of funders for the systematic review.                                           | 27                                               |

*From:* Moher D, Liberati A, Tetzlaff J, Altman DG, The PRISMA Group (2009). Preferred Reporting Items for Systematic Reviews and Meta-Analyses: The PRISMA Statement. PLoS Med 6(7): e1000097. doi:10.1371/journal.pmed1000097

**Table S2.** Database search strategy.

| Database      | Search (Jan 22 <sup>th</sup> , 2018)                                                                                                                                                                                                                                                                                                                                                                                                                                                                                                                                                                                                                                                                                                                                                                                                                                                                                                                                                                                                                                                                                                                                                                                                                                                                          |
|---------------|---------------------------------------------------------------------------------------------------------------------------------------------------------------------------------------------------------------------------------------------------------------------------------------------------------------------------------------------------------------------------------------------------------------------------------------------------------------------------------------------------------------------------------------------------------------------------------------------------------------------------------------------------------------------------------------------------------------------------------------------------------------------------------------------------------------------------------------------------------------------------------------------------------------------------------------------------------------------------------------------------------------------------------------------------------------------------------------------------------------------------------------------------------------------------------------------------------------------------------------------------------------------------------------------------------------|
| <b>EMBASE</b> | <p>(child OR children OR schoolchildren OR preschool OR preschoolers OR pediatrics OR pediatric OR paediatric OR adolescent OR adolescents OR adolescence OR childhood OR teen OR teens OR teenager OR teenagers OR youth OR youths)</p> <p><b>AND</b></p> <p>("socioeconomic factors" OR "socioeconomic factor" OR "socio-economic factors" OR "socio-economic factor" OR "socioeconomic status" OR education OR "educational status" OR "parent education" OR "parents education" OR income OR "maternal schooling")</p> <p><b>AND</b></p> <p>(diet OR diets OR "food consumption" OR "food habit" OR "food habits" OR "feeding behaviour" OR "feeding behavior" OR "feeding behaviors" OR "feeding behaviours" OR "dietary pattern" OR "dietary patterns" OR "diet pattern" OR "diet patterns" OR "eating pattern" OR "eating patterns" OR "dietary behavior" OR "dietary behaviors" OR "dietary behaviour" OR "dietary behaviours" OR "feeding pattern" OR "feeding patterns" OR "eating behavior" OR "eating behaviors" OR "eating behaviour" OR "eating behaviours")</p> <p><b>AND</b></p> <p>("principal component analysis" OR "cluster analysis" OR "cluster analyses" OR "reduced rank regression" OR "factor analysis" OR "factor analyses" OR "treelet transform" OR "latent class analysis")</p> |

|               |                                                                                                                                                                                                                                                                                                                                                                                                                                                                                                                                                                                                                                                                                                                                                                                                                                                                                                                                                                                                                                                                            |
|---------------|----------------------------------------------------------------------------------------------------------------------------------------------------------------------------------------------------------------------------------------------------------------------------------------------------------------------------------------------------------------------------------------------------------------------------------------------------------------------------------------------------------------------------------------------------------------------------------------------------------------------------------------------------------------------------------------------------------------------------------------------------------------------------------------------------------------------------------------------------------------------------------------------------------------------------------------------------------------------------------------------------------------------------------------------------------------------------|
| <b>LILACS</b> | <p>“crianças” OR "crianca" OR "nino" OR "ninos" OR “pré-escolar” OR “pré-escolares” OR “preescolar” OR "adolescente" OR "adolescentes" OR "adolescencia" OR "infancia" OR "escolar" OR "escolares" OR "estudiante" OR "estudiantes" ) [palavras]</p> <p><b>AND</b></p> <p>"fatores socioeconomicos" OR "factores socioeconomicos" OR "condicoes socioeconomicas" OR "condiciones socioeconomicas" OR "educacao" OR "educacion" OR "escolaridade" OR "escolaridad" OR "escolaridade materna" OR "renda" OR "renda familiar" OR "renta" OR "renta familiar" ) [palavras]</p> <p><b>AND</b></p> <p>“dieta” OR “dietas” OR “consumo de alimentos” OR “consumo alimentar” OR "padroes alimentares" OR "comportamento alimentar" OR "conducta alimentaria" OR "patrones alimentarios" [palavras]</p>                                                                                                                                                                                                                                                                             |
| <b>PubMed</b> | <p>("child"[MeSH Terms] OR "child"[All Fields] OR "children"[All Fields] OR schoolchildren[All Fields] OR preschool[All Fields] OR "child, preschool"[MeSH Terms] OR "preschool child"[All Fields] OR "preschoolers"[All Fields] OR "pediatrics"[MeSH Terms] OR "pediatrics"[All Fields] OR "pediatric"[All Fields] OR "paediatric"[All Fields] OR "adolescent"[MeSH Terms] OR "adolescent"[All Fields] OR "adolescents"[All Fields] OR "adolescence"[All Fields] OR "childhood"[All Fields] OR "teen"[All Fields] OR "teens"[All Fields] OR "teenager"[All Fields] OR "teenagers"[All Fields] OR "youth"[All Fields] OR "youths"[All Fields])</p> <p><b>AND</b></p> <p>("socioeconomic factors"[MeSH Terms] OR "socioeconomic factors"[All Fields] OR "socioeconomic factor"[All Fields] OR "socio-economic factors"[All Fields] OR "socio-economic factor"[All Fields] OR "socioeconomic status"[All Fields] OR "education"[All Fields] OR "educational status"[MeSH Terms] OR "educational status"[All Fields] OR "education"[MeSH Terms] OR "parent education"[All</p> |

|                       |                                                                                                                                                                                                                                                                                                                                                                                                                                                                                                                                                                                                                                                                                                                                                                                                                                                                                                                                                                                                                                                                                                                                                                                                                                                                                                                                                                                                                                                                                                                                                                                                                                                 |
|-----------------------|-------------------------------------------------------------------------------------------------------------------------------------------------------------------------------------------------------------------------------------------------------------------------------------------------------------------------------------------------------------------------------------------------------------------------------------------------------------------------------------------------------------------------------------------------------------------------------------------------------------------------------------------------------------------------------------------------------------------------------------------------------------------------------------------------------------------------------------------------------------------------------------------------------------------------------------------------------------------------------------------------------------------------------------------------------------------------------------------------------------------------------------------------------------------------------------------------------------------------------------------------------------------------------------------------------------------------------------------------------------------------------------------------------------------------------------------------------------------------------------------------------------------------------------------------------------------------------------------------------------------------------------------------|
|                       | <p>Fields] OR "parents education"[All Fields] OR "income"[MeSH Terms] OR "income"[All Fields] OR "maternal schooling"[All Fields])</p> <p><b>AND</b></p> <p>("diet"[MeSH Terms] OR "diet"[All Fields] OR "diets"[All Fields] OR "food consumption"[All Fields] OR "food habit"[All Fields] OR "food habits"[MeSH Terms] OR "food habits"[All Fields] OR "feeding behaviour"[All Fields] OR "feeding behavior"[MeSH Terms] OR "feeding behavior"[All Fields] OR "feeding behaviors"[All Fields] OR "feeding behaviour"[All Fields] OR "feeding behaviours"[All Fields] OR "dietary pattern"[All Fields] OR "dietary patterns"[All Fields] OR "diet pattern"[All Fields] OR "diet patterns"[All Fields] OR "eating pattern"[All Fields] OR "eating patterns"[All Fields] OR "dietary behavior"[All Fields] OR "dietary behaviors"[All Fields] OR "dietary behaviour"[All Fields] OR "dietary behaviours"[All Fields] OR "feeding pattern"[All Fields] OR "feeding patterns"[All Fields] OR "eating behavior"[All Fields] OR "eating behaviors" [All Fields] OR "eating behaviour" [All Fields] OR "eating behaviours" [All Fields])</p> <p><b>AND</b></p> <p>("principal component analysis"[MeSH Terms] OR "principal component analysis"[All Fields] OR "cluster analysis"[MeSH Terms] OR "cluster analysis"[All Fields] OR "cluster analyses"[All Fields] OR "reduced rank regression"[All Fields] OR "factor analysis, statistical"[MeSH Terms] OR "statistical factor analysis"[All Fields] OR "factor analysis"[All Fields] OR "factor analyses"[All Fields] OR "treelet transform"[All Fields] OR "latent class analysis"[All Fields])</p> |
| <b>Science Direct</b> | <p>(child* OR schoolchildren OR preschool* OR adolescen* OR teen* OR youth*)</p> <p><b>AND</b></p>                                                                                                                                                                                                                                                                                                                                                                                                                                                                                                                                                                                                                                                                                                                                                                                                                                                                                                                                                                                                                                                                                                                                                                                                                                                                                                                                                                                                                                                                                                                                              |

|                       |                                                                                                                                                                                                                                                                                                                                                                                                                                                                                                                                                                                                                                                                                                                                                                                                                          |
|-----------------------|--------------------------------------------------------------------------------------------------------------------------------------------------------------------------------------------------------------------------------------------------------------------------------------------------------------------------------------------------------------------------------------------------------------------------------------------------------------------------------------------------------------------------------------------------------------------------------------------------------------------------------------------------------------------------------------------------------------------------------------------------------------------------------------------------------------------------|
|                       | ("socioeconomic factor*" OR "socio-economic factor*" OR "socioeconomic status" OR education* OR "educational status" OR "parent* education*" OR income OR "maternal schooling")<br><br><b>AND</b><br><br>(diet* OR "food consumption" OR "food habit*" OR "feeding behavior*" OR "dietary pattern*" OR "diet pattern*" OR "eating pattern*" OR "dietary behavior*" OR "feeding pattern*" OR "eating behavior*")                                                                                                                                                                                                                                                                                                                                                                                                          |
| <b>Scopus</b>         | (child OR schoolchildren OR childhood OR preschool OR adolescent OR adolescence OR teen OR teenager OR youth )<br><br><b>AND</b><br><br>("socioeconomic factor" OR "socio-economic factor" OR "socioeconomic status" OR education OR "educational status" OR "parent education" OR income OR "maternal schooling")<br><br><b>AND</b><br><br>(diet OR "food consumption" OR "food habit" OR "feeding behavior" OR "feeding behaviour" OR "dietary pattern" OR "diet pattern" OR "eating pattern" OR "dietary behavior" OR "dietary behaviour" OR "feeding pattern" OR "eating behavior" )<br><br><b>AND</b><br><br>("Principal Component Analysis" OR "Cluster Analysis" OR "cluster analyses" OR "reduced rank regression" OR "factor analysis" OR "factor analyses" OR "treelet transform" OR "latent class analysis" ) |
| <b>Web of Science</b> | (child* OR schoolchildren OR preschool* OR adolescen* OR teen* OR youth*)<br><br><b>AND</b>                                                                                                                                                                                                                                                                                                                                                                                                                                                                                                                                                                                                                                                                                                                              |

|                       |                                                                                                                                                                                                                                                                                                                                                                                                                                                                                                                                                                                                 |
|-----------------------|-------------------------------------------------------------------------------------------------------------------------------------------------------------------------------------------------------------------------------------------------------------------------------------------------------------------------------------------------------------------------------------------------------------------------------------------------------------------------------------------------------------------------------------------------------------------------------------------------|
|                       | ("socioeconomic factor*" OR "socio-economic factor*" OR "socioeconomic status" OR education* OR "educational status" OR "parent* education*" OR income OR "maternal schooling")<br><br><b>AND</b><br><br>(diet* OR "food consumption" OR "food habit*" OR "feeding behavior*" OR "dietary pattern*" OR "diet pattern*" OR "eating pattern*" OR "dietary behavior*" OR "feeding pattern*" OR "eating behavior*")<br><br><b>AND</b><br><br>("Principal Component Analys*" OR "Cluster Analys*" OR "reduced rank regression" OR "factor analys*" OR "treelet transform" OR "latent class analys*") |
|                       | <b>Grey literature</b>                                                                                                                                                                                                                                                                                                                                                                                                                                                                                                                                                                          |
| <b>Google Scholar</b> | (children OR preschool OR adolescent) AND ("socioeconomic factors" OR education OR income) AND (diet OR diets OR food OR feeding OR dietary OR eating) AND ("Principal Component" OR Cluster OR regression OR factor OR "treelet transform" OR "latent class")                                                                                                                                                                                                                                                                                                                                  |
| <b>ProQuest</b>       | (diet OR diets OR "food consumption" OR "food habit" OR "food habits" OR "feeding behavior" OR "feeding behaviors" OR "feeding behaviour" OR "feeding behaviours" OR "dietary pattern" OR "dietary patterns" OR "diet pattern" OR "diet patterns" OR "eating pattern" OR "eating patterns" OR "dietary behavior" OR "dietary behaviors" OR "dietary behaviour" OR "dietary behaviours" OR "feeding pattern" OR "feeding patterns" OR "eating behavior" OR "eating behaviors" OR "eating behaviour" OR "eating behaviours")<br><br><b>AND</b>                                                    |

|  |                                                                                                                                                                                                                                                                                                                                                                                                                                                                                                                                                                                                                                                                                                                                                  |
|--|--------------------------------------------------------------------------------------------------------------------------------------------------------------------------------------------------------------------------------------------------------------------------------------------------------------------------------------------------------------------------------------------------------------------------------------------------------------------------------------------------------------------------------------------------------------------------------------------------------------------------------------------------------------------------------------------------------------------------------------------------|
|  | <p>(child OR children OR schoolchildren OR preschool OR preschoolers OR pediatric OR paediatric OR adolescent OR adolescents OR adolescence OR childhood OR teen OR teens OR teenager OR teenagers OR youth OR youths)</p> <p><b>AND</b></p> <p>("socioeconomic factors" OR "socioeconomic factor" OR "socio-economic factors" OR "socio-economic factor" OR "socioeconomic status" OR "education" OR "educational status" OR "parent education" OR "parents education" OR OR income OR "maternal schooling")</p> <p><b>AND</b></p> <p>("Principal Component Analysis" OR "Cluster Analysis" OR "cluster analyses" OR "reduced rank regression" OR "factor analysis" OR "factor analyses" OR "treelet transform" OR "latent class analysis")</p> |
|--|--------------------------------------------------------------------------------------------------------------------------------------------------------------------------------------------------------------------------------------------------------------------------------------------------------------------------------------------------------------------------------------------------------------------------------------------------------------------------------------------------------------------------------------------------------------------------------------------------------------------------------------------------------------------------------------------------------------------------------------------------|

**Table S3.** Summary of characteristics of the dietary assessment methods of the studies included in the systematic review.

| Author(s) and country                                           | Age, year or month, range (n participants)     | Dietary assessment method           |           |                                                                                                      | Validation study                                                                        |                  |         | Total score/<br>Risk of bias based on the quality of the dietary methodology |
|-----------------------------------------------------------------|------------------------------------------------|-------------------------------------|-----------|------------------------------------------------------------------------------------------------------|-----------------------------------------------------------------------------------------|------------------|---------|------------------------------------------------------------------------------|
|                                                                 |                                                | Type<br><br>(Recall/ report period) | Structure | Reporter                                                                                             | In the population<br>(children or adolescents) living in the same country of the study? | Reference method | Results |                                                                              |
| Cohort studies from High and Medium Human Development Countries |                                                |                                     |           |                                                                                                      |                                                                                         |                  |         |                                                                              |
| Ambrosini et al. [21]<br><br>England                            | 7y (6,202),<br>10y (5,949),<br>and 13y (4,986) | UFD<br><br>(3 non-consecutive days) | NA        | 7 y (parents)<br><br>10 and 13 y (children completed the diary with input from an adult as required) | NA                                                                                      | NA               | NA      | 30<br>Low risk of bias                                                       |
| Northstone et al.[24]<br><br>England                            | 7y (6,837),<br>10y (6,972)<br>and 13y (5,661)  | FD                                  | NA        | 7 y (caregiver)<br><br>10 and 13 y (children completed the                                           | NA                                                                                      | NA               | NA      | 30<br>Low risk of bias                                                       |

|                                                                                                             |                              |                          |                                                                                                                                                                                                                                                   |                                             |                                                                                                                                              |                                                    |                                                                                                                                                                                                                                                                      |                                     |
|-------------------------------------------------------------------------------------------------------------|------------------------------|--------------------------|---------------------------------------------------------------------------------------------------------------------------------------------------------------------------------------------------------------------------------------------------|---------------------------------------------|----------------------------------------------------------------------------------------------------------------------------------------------|----------------------------------------------------|----------------------------------------------------------------------------------------------------------------------------------------------------------------------------------------------------------------------------------------------------------------------|-------------------------------------|
|                                                                                                             |                              | (3 non-consecutive days) |                                                                                                                                                                                                                                                   | diary with input from an adult as required) |                                                                                                                                              |                                                    |                                                                                                                                                                                                                                                                      |                                     |
| <p>Fernández-Alvira et al. [28]</p> <p>Belgium, Cyprus, Estonia, Germany, Hungary, Italy, Spain, Sweden</p> | <p>2-9 and 4-11y (9,301)</p> | <p>FFQ (Last month)</p>  | <p>43 food items. CFC: 8 responses ranging from “Never/less than once per week” to “Four or more times per day”, and “I have no idea”</p> <p>The FFQ referred to meals outside the school canteen or child care meal provision settings only.</p> | <p>Parents</p>                              | <p><b>Reprod.</b><br/>Yes, except for Germany and Spain</p> <p><b>Validity</b><br/>Yes (validation for the milk consumption frequencies)</p> | <p>Calcium and potassium urinary Concentration</p> | <p><b>Reproducibility</b><br/>(Lanfer et al.,2011)</p> <p>Weighted kappa coefficients: 0.23 to 0.68;<br/>Spearman’s correlation coefficients: 0.32 to 0.76;</p> <p><b>Validity</b><br/>(Huybrechts et al., 2011)</p> <p>Significant positive correlation between</p> | <p>20<br/>Moderate risk of bias</p> |

|                                 |                   |                 |                                                                                     |         |    |              |                                                                                                                                                                                      |                             |
|---------------------------------|-------------------|-----------------|-------------------------------------------------------------------------------------|---------|----|--------------|--------------------------------------------------------------------------------------------------------------------------------------------------------------------------------------|-----------------------------|
|                                 |                   |                 |                                                                                     |         |    |              | milk consumption frequencies and the ratios of urinary calcium (Uca)/urinary creatinine (Uc) (0.16);<br>Weaker but significant positive correlation with the ratios of UCa/Cr (0.07) |                             |
| Lioret et al.[26]<br><br>France | 2 and 5y<br>(989) | FFQ<br><br>(ND) | 26 food groups.<br>CFC: 7 responses ranging from “Never” to “Several times per day” | Parents | No | four 24-h DR | <b>&gt; 10 years</b><br><br><b>Reproducibility</b><br>ICCs for nutrients:<br>0.39 for total protein to 0.83 for alcohol.<br><br><b>Validity</b><br>De-attenuated Pearson’s           | 20<br>Moderate risk of bias |

|                                        |                                 |                        |                                                     |                             |           |                     |                                                                                                                                                                                                                                                                    |                                        |
|----------------------------------------|---------------------------------|------------------------|-----------------------------------------------------|-----------------------------|-----------|---------------------|--------------------------------------------------------------------------------------------------------------------------------------------------------------------------------------------------------------------------------------------------------------------|----------------------------------------|
|                                        |                                 |                        |                                                     |                             |           |                     | <p>correlation coefficient: 0.25 (dietary fiber) to 0.90 (alcohol).</p> <p>Agreement rates (same or adjacent quintile) between 55% (for PUFA) and 95% (for alcohol)</p> <p>Misclassification to an extreme quintile was rare (&lt;5%). (Deschamps et al.,2009)</p> |                                        |
| <p>Camara et al.[63]</p> <p>France</p> | <p>2 and 5y (9,740)</p>         | <p>FFQ (ND)</p>        | <p>Described in Lioret et al.[26]</p>               | <p>Parents</p>              | <p>No</p> | <p>four 24-h DR</p> | <p>&gt; 10 years</p> <p>As described by Lioret et al., 2015</p>                                                                                                                                                                                                    | <p>20</p> <p>Moderate risk of bias</p> |
| <p>Lee et al.[42]</p> <p>Korea</p>     | <p>279 (7y)</p> <p>360 (9y)</p> | <p>FFQ (Past year)</p> | <p>90 food items. CFC: 7 responses ranging from</p> | <p>Parents or guardians</p> | <p>ND</p> | <p>ND</p>           | <p><b>Reproducibility</b> (Chung et al., 2015)</p>                                                                                                                                                                                                                 |                                        |

|                                                                             |                                |                                                                                       |                                                                                                                                                                                        |         |    |               |                                                                                                                          |                         |
|-----------------------------------------------------------------------------|--------------------------------|---------------------------------------------------------------------------------------|----------------------------------------------------------------------------------------------------------------------------------------------------------------------------------------|---------|----|---------------|--------------------------------------------------------------------------------------------------------------------------|-------------------------|
|                                                                             |                                |                                                                                       | “rarely eaten” to “more than three times per day”.<br>Portion sizes: small, average, or large                                                                                          |         |    |               | Correlation coefficients: 0.5 to 0.8<br><br><b>Validity</b> (Chung et al., 2015)<br>Correlation coefficients: 0.3 to 0.6 | 15<br>High risk of bias |
| Gatica et al.<br>[29]<br><br>Brazil                                         | 24 mo (3,790)<br>48 mo (3,714) | A list of food items or food groups that the child ate as usual<br><br>(Previous day) | The number of times/day each food item was consumed in seven meals or periods of the day: wake-up time, morning, lunch, afternoon, dinner, evening, night but not the amount consumed. | Mother  | No | NA            | NA                                                                                                                       | 15<br>High risk of bias |
| <b>Cross-sectional studies from High Human Development Countries (HHDC)</b> |                                |                                                                                       |                                                                                                                                                                                        |         |    |               |                                                                                                                          |                         |
| Oellingrath et al. [40]                                                     | 9-10y (924)                    | FFQ                                                                                   | 39 food items, 11 types of drinks, 13                                                                                                                                                  | Parents | No | Not validated | NA                                                                                                                       | 10                      |

|                                         |                     |                                                   |                                                                                                                                                    |                   |    |     |                                                                                                                            |                             |
|-----------------------------------------|---------------------|---------------------------------------------------|----------------------------------------------------------------------------------------------------------------------------------------------------|-------------------|----|-----|----------------------------------------------------------------------------------------------------------------------------|-----------------------------|
| Norway                                  |                     | (Last 6 mo)                                       | snack items and 5 main meals.<br>CFC: 7 responses ranging from: 1–3 times a month' to 3 or more times per day'; and 'rarely/never'                 |                   |    |     |                                                                                                                            | High risk of bias           |
| Grieger et al.[43]<br>Australia         | 2-8y<br>(2,287)     | 24h DR<br><br>(2 non-consecutive days)            | NA                                                                                                                                                 | Child and parents | ND | ND  | ND                                                                                                                         | 30<br>Low risk of bias      |
| McNaughton et al. [23]<br><br>Australia | 12-18y<br><br>(764) | FFQ<br>(Past year)<br><br>and<br>24h DR (One day) | 108 foods and beverages items.<br>CFC: 9 responses ranging from: "never or less than once a month" to "6 or more times per day".<br>Information on | Adolescents       | No | WFD | <b>Adults</b> (Ireland et al., 1994)<br><br>The authors described that the FFQ appeared to overestimate the consumption of | 25<br>Moderate risk of bias |

|                                        |                                 |                                            |                                                                                                                                                                                    |                                                                                        |     |           |                                                                                                                                      |                             |
|----------------------------------------|---------------------------------|--------------------------------------------|------------------------------------------------------------------------------------------------------------------------------------------------------------------------------------|----------------------------------------------------------------------------------------|-----|-----------|--------------------------------------------------------------------------------------------------------------------------------------|-----------------------------|
|                                        |                                 |                                            | portion sizes was not included.                                                                                                                                                    |                                                                                        |     |           | fruit and vegetable                                                                                                                  |                             |
| Ambrosini et al. [27]<br><br>Australia | 14y<br>(1,613)                  | FFQ (semi-quantitative)<br><br>(Past year) | 212 individual foods, mixed dishes and beverages with standard serving sizes. CFC: never, rarely, number of times per month, per week and per day.                                 | Parents and adolescents                                                                | Yes | 3-day FD  | (GL Ambrosini, HN de Klerk, TA O'Sullivan et al., unpublished results)<br><br>FFQ was able to correctly rank most nutrient intakes   | 25<br>Moderate risk of bias |
| Craig et al. [44]<br><br>Scotland      | 5-11y (721)<br><br>12-17y (512) | FFQ<br><br>(Last 2-3 mo)                   | Version C2 (5-11 y): 140 foods or drinks with a measure defined for each item.<br><br>Version C3 (12-13 y): Version C2 + six items covering intake of coffee and alcoholic drinks. | 5-11 y (parent or guardian + child)<br><br>12-17 y (adolescent + parents or guardians) | Yes | 4-day WFD | <b>Version C2</b> (Craig et al., 2010)<br>Spearman correlation coefficients: 0.21 to 0.56.<br>Significant (P<0.05) for all nutrients | 25<br>Moderate risk of bias |

|                      |                 |                         |                                |            |    |          |                                                                                                                                                                                                                                                                                                                                             |    |
|----------------------|-----------------|-------------------------|--------------------------------|------------|----|----------|---------------------------------------------------------------------------------------------------------------------------------------------------------------------------------------------------------------------------------------------------------------------------------------------------------------------------------------------|----|
|                      |                 |                         |                                |            |    |          | <p><b>Version C3</b><br/>(Craig er al., 2010)<br/>Spearman correlation coefficients: 0.12 to 0.45.<br/>Significant for all nutrients except energy, total fat (% energy) and vitamins C and E..</p> <p>The ranking agreement was better in younger children, absolute intakes agreed better between the two methods for older children.</p> |    |
| Bibiloni et al. [45] | 12-17 y (1,231) | FFQ (semi-quantitative) | 145 items (118 of the original | Adolescent | No | 4-day FD | <b>Adults</b>                                                                                                                                                                                                                                                                                                                               | 25 |

|                                      |                  |                                                                         |                                                                                                                                                                 |                                                           |                                                                                   |    |                                                                                                                                                                                                                                                                                                                 |                           |
|--------------------------------------|------------------|-------------------------------------------------------------------------|-----------------------------------------------------------------------------------------------------------------------------------------------------------------|-----------------------------------------------------------|-----------------------------------------------------------------------------------|----|-----------------------------------------------------------------------------------------------------------------------------------------------------------------------------------------------------------------------------------------------------------------------------------------------------------------|---------------------------|
| Spain                                |                  | (Past year)<br>and 24h DR<br>(2 non-<br>consecutive<br>days)            | validated FFQ<br>plus the most<br>characteristic<br>Balearic Islands<br>foods) arranged<br>by food type and<br>meal pattern.<br>CFC: per day,<br>week or month. |                                                           |                                                                                   |    | <b>Reproducibility</b><br>(Martin-Moreno<br>et al., 1993)<br>Pearson<br>Correlation<br>coefficients: 0.51<br>for saturated fat<br>to 0.88 for<br>alcohol.<br><br><b>Validity</b><br>(Martin-Moreno<br>et al., 1993)<br>Pearson<br>Correlation<br>coefficients: 0.20<br>for vitamin A<br>and 0.88 for<br>alcohol | Moderate<br>risk of bias  |
| Aranceta et al.<br>[64]<br><br>Spain | 2-14y<br>(3,534) | FFQ<br>and 24h DR<br><br>24-h DR (1<br>day). A<br>second 24-h<br>DR was | 164 items                                                                                                                                                       | Children under<br>8 y<br>(child + mother<br>or caregiver) | The authors stated<br>that the FFQ was<br>validated, but not<br>cited the results | ND | ND                                                                                                                                                                                                                                                                                                              | 30<br>Low risk of<br>bias |

|                                      |                   |                                 |                                                                                                           |                                                                                                                                   |    |                            |                                                                                                                                                                                                                        |                                |
|--------------------------------------|-------------------|---------------------------------|-----------------------------------------------------------------------------------------------------------|-----------------------------------------------------------------------------------------------------------------------------------|----|----------------------------|------------------------------------------------------------------------------------------------------------------------------------------------------------------------------------------------------------------------|--------------------------------|
|                                      |                   | applied in 25–30% of the sample |                                                                                                           |                                                                                                                                   |    |                            |                                                                                                                                                                                                                        |                                |
| Danyliw et al.<br>[53]<br><br>Canada | 2-18y<br>(10,038) | 24h DR<br><br>(1 day)           | NA                                                                                                        | ≥12 y<br>(adolescent)<br><br>6–11 y (children/<br>adolescent<br>+ parents or<br>caregiver)<br><br>< 6 y (parents or<br>caregiver) | NA | NA                         | NA                                                                                                                                                                                                                     | 25<br>Moderate<br>risk of bias |
| Smith et al.<br>[20]<br><br>England  | 7y<br>(6,056)     | FFQ<br><br>(Nowadays)           | 94 food items.<br>CFC: 5 responses<br>ranging from:<br>“never or rarely”<br>to “more than<br>once a day”. | Mothers                                                                                                                           | No | Biochemical pa<br>rameters | <b>In adults</b><br>(Rogers;<br>Emmett, 1998)<br>The FFQ<br>produced mean<br>nutrient intakes<br>similar to those<br>obtained for<br>women in the<br>National Diet<br>and Nutritional<br>Survey for<br>British adults. | 20<br>Moderate<br>risk of bias |

|                                      |             |                       |                                                                                                                                                                                                                                                     |                                                                                |    |                        |                                                                                                                                  |                             |
|--------------------------------------|-------------|-----------------------|-----------------------------------------------------------------------------------------------------------------------------------------------------------------------------------------------------------------------------------------------------|--------------------------------------------------------------------------------|----|------------------------|----------------------------------------------------------------------------------------------------------------------------------|-----------------------------|
|                                      |             |                       |                                                                                                                                                                                                                                                     |                                                                                |    |                        | The erythrocyte DHA content increased significantly with increasing frequency of consumption of oily fish (Rogers; Emmett, 1998) |                             |
| Northstone et al.[46]<br><br>England | 13y (3,951) | FFQ<br><br>(Nowadays) | 80 food items (the FFQ filled by the mothers)<br><br>54 food items (the FFQ filled by the adolescent)<br><br>CFC: 9 responses ranging from: “never or rarely” to “more than once a day”.<br><br>The mother was asked specifically to respond to the | The mother filled the FFQ and the adolescent filled a short version of the FFQ | No | Biochemical parameters | As described by Smith et al. [20]                                                                                                | 20<br>Moderate risk of bias |

|  |  |                                                                                                                                                                                                                                                                                                                                                                                                               |  |  |  |  |  |
|--|--|---------------------------------------------------------------------------------------------------------------------------------------------------------------------------------------------------------------------------------------------------------------------------------------------------------------------------------------------------------------------------------------------------------------|--|--|--|--|--|
|  |  | <p>questions only regarding the foods provided by her, including packed lunches but excluding school dinners and other foods consumed outside the home.</p> <p>In the FFQ filled by the adolescent, they were asked about their consumption of foods that were not included in the mother's FFQ, (foods consumed as part of school dinners, food bought outside school and additional snacks and drinks).</p> |  |  |  |  |  |
|--|--|---------------------------------------------------------------------------------------------------------------------------------------------------------------------------------------------------------------------------------------------------------------------------------------------------------------------------------------------------------------------------------------------------------------|--|--|--|--|--|

|                                           |                              |                        |                                                                                                                                                                                                                                                                               |                    |     |                        |                                                                                                                                                                                                                                               |                             |
|-------------------------------------------|------------------------------|------------------------|-------------------------------------------------------------------------------------------------------------------------------------------------------------------------------------------------------------------------------------------------------------------------------|--------------------|-----|------------------------|-----------------------------------------------------------------------------------------------------------------------------------------------------------------------------------------------------------------------------------------------|-----------------------------|
| Northstone and Emmett [65]<br><br>England | 4y (6,592)<br><br>7y (6,215) | FFQ<br><br>(Nowadays)  | 90 food items<br>CFC: 5 responses ranging from: "never or rarely" to "more than once a day".                                                                                                                                                                                  | Mothers            | No  | Biochemical parameters | As described by Smith et al. [20]                                                                                                                                                                                                             | 20<br>Moderate risk of bias |
| Leventakou et al., [66]<br><br>Greece     | 4y (683)                     | FFQ<br><br>(Past year) | 118 food items<br>CFC: times per day, week, month and year or never.<br><br>The FFQ presented the following components: food frequency, type of meals during the day, use of dietary supplements, type of fat used for cooking, frequency of meals consumed in restaurants or | Primary caregivers | Yes | 3 day FD               | (Leventakou et al., 2014)<br><br>Weighted kappa statistics: 0.21 to 0.40 for most foods and nutrients.<br><br>The mean and median values of all food group and nutrient intakes did not differ significantly between the two dietary methods. | 25<br>Moderate risk of bias |

|                                     |                            |                      |                                                                                                                                                                                                                 |         |    |                                       |                                                                                                                                                                                   |                             |
|-------------------------------------|----------------------------|----------------------|-----------------------------------------------------------------------------------------------------------------------------------------------------------------------------------------------------------------|---------|----|---------------------------------------|-----------------------------------------------------------------------------------------------------------------------------------------------------------------------------------|-----------------------------|
|                                     |                            |                      | take away and television viewing during meals). Parents could choose from one or two portion sizes. Seasonality of consumption was also reported in all food items.                                             |         |    |                                       | On average, 88 % of participants were classified into the same or adjacent tertiles for nutrient and food group intakes by both dietary methods.                                  |                             |
| Wall et al. [67]<br><br>New Zealand | 3.5y (550)<br><br>7y (591) | FFQ<br><br>(Last mo) | 71 food items (3.5 years)<br><br>77 Food Items (7 years).<br>CFC: 8 responses ranging from: never to 2 or more times per day.<br>Standard serving sizes were used as a reference for the core food group items. | Parents | No | 4 day WFD and the biochemical status. | <b>In 6 to 24 months years</b><br><br><b>Reproducibility</b> (Chua, 1999)<br>Spearman correlation coefficient: of the 54 foods, 44 of the foods had correlation of 0.5 or higher. | 20<br>Moderate risk of bias |

|                                       |                      |                                |                                                                                  |                           |     |           |                                                                                                                                                                   |                             |
|---------------------------------------|----------------------|--------------------------------|----------------------------------------------------------------------------------|---------------------------|-----|-----------|-------------------------------------------------------------------------------------------------------------------------------------------------------------------|-----------------------------|
|                                       |                      |                                |                                                                                  |                           |     |           | <b>Validity</b> (Chua, 1999)<br>Comparing food groups against nutrients resulted in fairly poor correlation except for read meat, breast milk and infant formula. |                             |
| Ovaskainen et al. [68]<br><br>Finland | 3y (708)<br>6y (841) | FD<br>(3 non-consecutive days) | NA                                                                               | Parents and day caregiver | NA  | NA        | NA                                                                                                                                                                | 30<br>Low risk of bias      |
| Durão et al. [69]<br><br>Finland      | 4y (3,422)           | FFQ (The previous six mo)      | 35 items.<br>CFC: 9 responses ranging from<br>Options: “never” to “≥4 times/day” | Child primary caregiver   | Yes | 3 days FD | (Durão et al., 2016)<br><br>Pearson correlation coefficient: significant positive moderate were found for vegetable soup                                          | 25<br>Moderate risk of bias |

|                                    |                  |                    |                                                                                                                 |         |    |                                                                                                     |                                                                                                                                                                                                                                                                |                            |
|------------------------------------|------------------|--------------------|-----------------------------------------------------------------------------------------------------------------|---------|----|-----------------------------------------------------------------------------------------------------|----------------------------------------------------------------------------------------------------------------------------------------------------------------------------------------------------------------------------------------------------------------|----------------------------|
|                                    |                  |                    |                                                                                                                 |         |    |                                                                                                     | ( $r=0.54$ , $P<0.001$ ), fruit ( $r=0.42$ , $P<0.001$ ), milk ( $r=0.46$ , $P<0.001$ ) and yoghurts ( $r=0.48$ , $P<0.001$ ). ICC: 0.54 to 0.17                                                                                                               |                            |
| Moreira et al.[49]<br><br>Portugal | 5-10y<br>(1,976) | FFQ<br>(Last year) | 86 food items. CFC: nine responses ranging from: never or less than once per month, to six or more times a day, | Parents | No | 7-day FD as regards the fatty acid composition, with the composition of subcutaneous adipose tissue | <p><b>Adults</b> (Lopes et al., 2007)</p> <p>Spearman correlation between FFQ and 7-day FD for fatty acid classes: 0.19 (trans isomers) to 0.72 (total saturated fat)</p> <p>Spearman correlation between FFQ and adipose tissue for fatty acid classes: -</p> | 15<br>High risk<br>of bias |

|                                              |                    |                                               |    |            |     |                                            |                                                                                                                                                                                                                                 |                        |
|----------------------------------------------|--------------------|-----------------------------------------------|----|------------|-----|--------------------------------------------|---------------------------------------------------------------------------------------------------------------------------------------------------------------------------------------------------------------------------------|------------------------|
|                                              |                    |                                               |    |            |     |                                            | 0.02 (trans isomers) to 0.44 (myristic)                                                                                                                                                                                         |                        |
| Borges et al. [47]<br><br>10 European cities | 12.5-17.5y (2,213) | Computarized 24 h-DR (2 non-consecutive days) | ND | Adolescent | Yes | One day FD (study 1) and 24-h DR (study 2) | <p>Study 1 (Vereecken et al., 2005)<br/>Spearman correlation: 0.44 to 0.79<br/>Weighted Kappa: 0.11 to 0.55</p> <p>Study 2 (Vereecken et al., 2005)<br/>Spearman correlation: 0.44 to 0.86<br/>Weighted Kappa: 0.04 to 0.73</p> | 30<br>Low risk of bias |

|                                                                     |                  |                 |                                                                                  |                          |                                        |           |                                                                                                                                                                                                                   |                             |
|---------------------------------------------------------------------|------------------|-----------------|----------------------------------------------------------------------------------|--------------------------|----------------------------------------|-----------|-------------------------------------------------------------------------------------------------------------------------------------------------------------------------------------------------------------------|-----------------------------|
| Manyanga et al. [70]                                                |                  |                 |                                                                                  |                          |                                        |           | <b>Reliability</b><br>(Saloheimo et al., 2015)<br>ICC: 0.37 to 0.78.<br>Gross misclassification for all food groups was < 5%.                                                                                     |                             |
| Australia<br>Canada<br>Finland<br>USA<br>Portugal<br>United Kingdom | 9-11y<br>(3,274) | FFQ<br><br>(ND) | 23 food groups.<br>CFC: 8 responses ranging from: never to more than once a day. | Children and adolescents | Yes<br>(for USA, Colombia and Finland) | 3 days FD | <b>Validity</b><br>(Saloheimo et al., 2015)<br>Spearman correlation coefficients: below 0.5 for 22/23 food groups, and they differed among country sites<br>Gross misclassification was <5% for 22/23 food groups | 20<br>Moderate risk of bias |

|                                                                                                |                   |                                                                  |                                                                                                                                                                                                        |                                    |    |                                                                                                     |                                                                                                                                                |                             |
|------------------------------------------------------------------------------------------------|-------------------|------------------------------------------------------------------|--------------------------------------------------------------------------------------------------------------------------------------------------------------------------------------------------------|------------------------------------|----|-----------------------------------------------------------------------------------------------------|------------------------------------------------------------------------------------------------------------------------------------------------|-----------------------------|
| Krusinska et al. [48]<br><br>Poland                                                            | 13-18y<br>(1,176) | FFQ (for Fruit/<br>Vegetable/<br>Fibre Intake<br><br>(Last year) | Nine dietary fibre sources.<br>CFC: less than once per week, once per week, 2–3 times per week, 4–6 times per week, every day                                                                          | Adolescent                         | No | Multiple FD                                                                                         | <b>In adults</b><br>Correlations coefficient: 0.65 for grams of fat and 0.40 for percentage energy from carbohydrate (Thompson and Byers,1994) | 20<br>Moderate risk of bias |
| <b>Cross-sectional studies from Medium and Low Human Development Countries (MHDC and LHDC)</b> |                   |                                                                  |                                                                                                                                                                                                        |                                    |    |                                                                                                     |                                                                                                                                                |                             |
| Araujo et al. [38]<br><br>Portugal                                                             | 13y (1,489)       | FFQ<br><br>(Last year)                                           | 91 food or beverage items. CFC: nine responses ranging from: never to 6 times a day. It also included an open-ended section for foods not listed in the questionnaire, but eaten at least once a week. | Adolescents + parents or guardians | No | 7-day FD as regards the fatty acid composition, with the composition of subcutaneous adipose tissue | <b>In adults</b><br><br>As described by Moreira et al. 2010                                                                                    | 20<br>Moderate risk of bias |

|                                         |                   |                        |                                                                                                                                                                                                                                                                          |                                         |     |               |                                                                                                                               |                             |
|-----------------------------------------|-------------------|------------------------|--------------------------------------------------------------------------------------------------------------------------------------------------------------------------------------------------------------------------------------------------------------------------|-----------------------------------------|-----|---------------|-------------------------------------------------------------------------------------------------------------------------------|-----------------------------|
| Garba et al.<br>[32]<br><br>Malaysia    | 13-17y<br>(2,480) | FFQ<br><br>(Last mo)   | 126 items commonly eaten in Malaysia. CFC: 5 responses ranging from: never/rarely to daily intake. The serving size for each food item was also given according to the medium serving sizes in food serving size album and household measures were used for illustration | Adolescent                              | No  | ND            | ND                                                                                                                            | 15<br>High risk of bias     |
| Abdullah et al.<br>[41]<br><br>Malaysia | 12-19y<br>(454)   | FFQ<br><br>(Last year) | 124 food items<br><br>CFC: ND                                                                                                                                                                                                                                            | Adolescent +<br>trained<br>interviewers | Yes | 3 days 24h DR | <b>Reproducibility</b><br>(Abdullah et al., 2012)<br>Pearson correlation coefficient: 0.43 for carotene to 0.86 for total fat | 25<br>Moderate risk of bias |

|  |  |  |  |  |  |                                                                                                                                                                                                                                                                                                                                                                                    |  |
|--|--|--|--|--|--|------------------------------------------------------------------------------------------------------------------------------------------------------------------------------------------------------------------------------------------------------------------------------------------------------------------------------------------------------------------------------------|--|
|  |  |  |  |  |  | <p>intake (median= 0.67)</p> <p><b>Validity</b><br/>(Abdullah et al., 2012)<br/>Pearson correlation coefficient: 0.22 (zinc) to 0.68 (calcium), median <i>r</i>-value of 0.43. Estimated mean intake for most nutrients assessed by the FFQ were higher as compared to the three DRs (<math>p&lt;0.05</math>).</p> <p>Most nutrients were classified into the same or adjacent</p> |  |
|--|--|--|--|--|--|------------------------------------------------------------------------------------------------------------------------------------------------------------------------------------------------------------------------------------------------------------------------------------------------------------------------------------------------------------------------------------|--|

|                                                 |                  |                                 |                                                                                                                                                                                |                             |     |                            |                                                                                                                                           |                                |
|-------------------------------------------------|------------------|---------------------------------|--------------------------------------------------------------------------------------------------------------------------------------------------------------------------------|-----------------------------|-----|----------------------------|-------------------------------------------------------------------------------------------------------------------------------------------|--------------------------------|
|                                                 |                  |                                 |                                                                                                                                                                                |                             |     |                            | quartiles<br>(median=52.7%).                                                                                                              |                                |
| North et al.<br>[22]<br><br>England             | 3y<br>(7,814)    | FFQ<br><br>(Nowadays)           | CFC: 5 responses<br>ranging from:<br>never or rarely to<br>more than once a<br>day.                                                                                            | Mothers                     | No  | Biochemical pa<br>rameters | As described by<br>Smith et al. [20]                                                                                                      | 20<br>Moderate<br>risk of bias |
| Northstone<br>and Emmett<br>[25]<br><br>England | 2y<br>(9,599)    | FFQ<br><br>(Nowadays)           | 53 items of<br>foods and drinks.<br>CFC: For milks<br>and other drinks,<br>this was recorded<br>as times per week<br>and for foods this<br>was recorded as<br>times per month. | Mothers                     | No  | Biochemical pa<br>rameters | As described by<br>Smith et al. [20]                                                                                                      | 20<br>Moderate<br>risk of bias |
| Silva et al. [31]<br><br>Brazil                 | 7-14y<br>(1,136) | FFQ<br><br>(Previous six<br>mo) | 132 food items.<br>CFC: 4 responses<br>ranging from:<br>never to 5- 7 times<br>a week                                                                                          | Children and<br>Adolescents | Yes | 2 day 24h DR               | (Voci et al., 2011)<br>Pearson<br>correlation<br>coefficient: -<br>0.07 (iron) to 0.58<br>(vitamin C)<br><br>Calibration<br>coefficients: | 20<br>Moderate<br>risk of bias |

|                                    |                 |                                           |                                                                                        |                                     |     |               |                                      |                                |
|------------------------------------|-----------------|-------------------------------------------|----------------------------------------------------------------------------------------|-------------------------------------|-----|---------------|--------------------------------------|--------------------------------|
|                                    |                 |                                           |                                                                                        |                                     |     |               | -0.07 (iron) to<br>0.40 (vitamin C)  |                                |
| Nobre et al.<br>[30]<br><br>Brazil | 5y (232)        | FFQ<br><br>(ND)                           | 65 food items.<br>CFC: 5 responses<br>ranging from:<br>rarely or never to<br>every day | Parents                             | No  | ND            | ND                                   | 15<br>High risk<br>of bias     |
| Pinho et al.<br>[33]<br><br>Brazil | 11-17y<br>(535) | FFQ<br><br>(Previous six<br>mo)           | 94 items.<br>CFC: 7 responses<br>ranging from:<br>never to 2 or more<br>times a day.   | Adolescent                          | Yes | 2 days 24h DR | As described by<br>Silva et al. [31] | 25<br>Moderate<br>risk of bias |
| Villa et al. [52]<br><br>Brazil    | 8- 9y (328)     | FD<br><br>(3 non-<br>consecutive<br>days) | NA                                                                                     | Children +<br>parents/<br>guardians | NA  | NA            | NA                                   | 30<br>Low risk of<br>bias      |

|                                     |                       |                                            |                                                                                                                                                                                                                                          |                                                                                                                                                                                                                   |    |    |    |                            |
|-------------------------------------|-----------------------|--------------------------------------------|------------------------------------------------------------------------------------------------------------------------------------------------------------------------------------------------------------------------------------------|-------------------------------------------------------------------------------------------------------------------------------------------------------------------------------------------------------------------|----|----|----|----------------------------|
| Borges et al.<br>[47]<br><br>Brasil | 12.5-17.5y<br>(3,194) | FD<br>(2 non-<br>consecutive<br>days)      | NA                                                                                                                                                                                                                                       | Adolescent<br>(when the<br>individual was<br>unable to fill in<br>the FD, this was<br>completed with<br>the help of<br>another<br>household<br>member or a<br>person that was<br>appointed by the<br>individual). | NA | NA | NA | 30<br>Low risk of<br>bias  |
| Mais et al. [71]<br><br>Brazil      | 2- 9y (929)           | FFQ<br>(7 days before<br>the<br>interview) | 19 categories of<br>foods based on<br>their association<br>with obesity, their<br>high intake<br>frequency in the<br>Brazilian<br>population, and<br>recommendations<br>of the Dietary<br>Guidelines for the<br>Brazilian<br>Population. | Parents                                                                                                                                                                                                           | No | ND | ND | 10<br>High risk<br>of bias |

|                                       |                  |                                    |                                                                           |                            |    |    |    |                             |
|---------------------------------------|------------------|------------------------------------|---------------------------------------------------------------------------|----------------------------|----|----|----|-----------------------------|
|                                       |                  |                                    | CFC: 5 responses ranging from: not consumed to every day.                 |                            |    |    |    |                             |
| Kehoe et al.<br>[50]<br><br>India     | 9.5y<br>(538)    | FFQ<br><br>(Last mo)               | 136 items.<br>CFC: daily, weekly or monthly.                              | Child + parent or guardian | No | ND | ND | 15<br>High risk of bias     |
| Nasreddine et al. [72]<br><br>Lebanon | 2-5y<br>(525)    | 24h DR<br>(1 day)                  | NA                                                                        | Parents or caretaker       | NA | NA | NA | 25<br>Moderate risk of bias |
| Shang et al.[51]<br><br>China         | 6-13y<br>(5,267) | 24h DR<br><br>(3 consecutive days) | NA                                                                        | Children and adolescents   | NA | NA | NA | 25<br>Moderate risk of bias |
| Wu et al. [60]<br><br>China           | 5y (18,046)      | FFQ<br><br>(ND)                    | Eleven food groups.<br>CFC: 5 responses ranging from: never to every day. | Parents                    | ND | ND | ND | 15<br>High risk of bias     |

|                                                               |                  |                 |                                                       |                            |                       |          |                                                     |                                |
|---------------------------------------------------------------|------------------|-----------------|-------------------------------------------------------|----------------------------|-----------------------|----------|-----------------------------------------------------|--------------------------------|
| Manyanga et al., [70]                                         |                  |                 |                                                       |                            |                       |          |                                                     |                                |
| Brazil<br>Colombia<br>China<br>South Africa<br>India<br>Kenya | 9-11y<br>(3,534) | FFQ<br><br>(ND) | As described by<br>Manyanga et al.<br>(2017) for HHDC | Children and<br>adolescent | Yes<br>(for Colombia) | 3 day FD | As described by<br>Manyanga et al.<br>[70] for HHDC | 20<br>Moderate<br>risk of bias |

Abbreviations: 24 H-DR - 24-hour dietary recall; CFC - Consumption frequencies categories; Comp. 24 h-DR – Computerized 24 hour dietary recall; FD - food diary; FFQ – food frequency questionnaire; ICC - intraclass coefficient correlation; Mo - months; NA – not applicable; ND – not described; UFD - unweighted food diary; WFD-weighed food diary.

#### References of the Reproducibility and validity studies

Chua, S. W. Y. *Iron and vitamin A nutrition of young Auckland children: an investigation into the methods to assess the nutritional status of micro-nutrients in 6-24 month olds: a thesis presented in partial fulfilment of the requirements for the degree of Master of Science in Nutritional Science at Massey University* (Doctoral dissertation, Massey University) **1999**

Chung, J.; Kwon, S. O.; Ahn, H.; Hwang, H.; Hong, S. J.; Oh, S. Y. Association between dietary patterns and atopic dermatitis in relation to GSTM1 and GSTT1 polymorphisms in young children. *Nutrients* **2015**, 7(11), 9440-9452. DOI: 10.3390/nu7115473.

Craig, L. C. A.; McNeill, G.; Masson, L. F.; Macdiarmid, J.; Holmes, B.; Nelson, M.; Sheehy, C. Relative validity of two food-frequency questionnaires for children compared with 4-day diet diaries. *Proc Nutr Soc* **2010**, 69(OCE6). DOI: 10.1017/S0029665110002910

Deschamps, V.; De Lauzon-Guillain, B.; Lafay, L.; Borys, J. M.; Charles, M. A.; Romon, M. Reproducibility and relative validity of a food-frequency questionnaire among French adults and adolescents. *Eur J Clin Nutr* **2009**, 63(2), 282-291. DOI: [10.1038/sj.ejcn.1602914](https://doi.org/10.1038/sj.ejcn.1602914)

Durão, C.; Severo, M.; Oliveira, A.; Moreira, P.; Guerra, A.; Barros, H.; Lopes, C. Association of maternal characteristics and behaviours with 4-year-old children's dietary patterns. *Matern Child Nutr* **2016**, Apr 3, (Epub ahead of print) DOI 10.1111/mcn.12278.

- Huybrechts, I.; Börnhorst, C.; Pala, V.; Moreno, L. A.; Barba, G.; Lissner, L.; et al. Evaluation of the Children's Eating Habits Questionnaire used in the IDEFICS study by relating urinary calcium and potassium to milk consumption frequencies among European children. *Int J Obes* **2011**, 35(S1), S69-S78. DOI: 10.1038/ijo.2011.37.
- Ireland, P.; Jolley, D.; Giles, G.; O'Dea, K.; Powles, J.; Rutishauser, I.; et al. Development of the Melbourne FFQ: a food frequency questionnaire for use in an Australian prospective study involving an ethnically diverse cohort. *Asia Pac J Clin Nutr* **1994**, 3(1), 19-31.
- Lanfer, A.; Hebestreit, A.; Ahrens, W.; Krogh, V.; Sieri, S.; Lissner, L.; et al. Reproducibility of food consumption frequencies derived from the Children's Eating Habits Questionnaire used in the IDEFICS study. *Int J Obes* **2011**, 35(S1), S61-S68. DOI: 10.1038/ijo.2011.3.
- Leventakou, V.; Georgiou, V.; Chatzi, L.; Sarri, K. Relative validity of an FFQ for pre-school children in the mother-child 'Rhea' birth cohort in Crete, Greece. *Public Health Nutr* **2015**, 18(3), 421-427. DOI: 10.1017/S1368980014000445.
- Lopes, C.; Aro, A.; Azevedo, A.; Ramos, E.; Barros, H. Intake and adipose tissue composition of fatty acids and risk of myocardial infarction in a male Portuguese community sample. *J Am Diet Assoc* **2007**, 107(2), 276-286. DOI: [10.1016/j.jada.2006.11.008](https://doi.org/10.1016/j.jada.2006.11.008).
- Martin-Moreno, J. M.; Boyle, P.; Gorgojo, L.; Maisonneuve, P.; Fernandez-rodriguez, J. C.; Salvini, S.; Willett, W. C. Development and validation of a food frequency questionnaire in Spain. *International journal of epidemiology* **1993**, 22, 512-519.
- Nurul-Fadhilah, A.; Teo, P.S.; Foo, L.H. Validity and reproducibility of a food frequency questionnaire (FFQ) for dietary assessment in Malay adolescents in Malaysia. *Asia Pac J Clin Nutr*. **2012**, 21 (1):97-103.
- Rogers, I.; Emmett, P. Diet during pregnancy in a population of pregnant women in South West England. *Eur J Clin Nutr* **1998**, 52, 246-250.
- Saloheimo, T.; González, S. A.; Erkkola, M.; Milauskas, D. M.; Meisel, J. D.; Champagne, C. M., et al. The reliability and validity of a short food frequency questionnaire among 9–11-year olds: a multinational study on three middle-income and high-income countries. *Int J Obes Suppl* **2015**, 5(S2), S22. DOI: 10.1038/ijosup.2015.
- Thompson, F. E.; Byers, T. Dietary assessment resource manual. *J Nutr* **1994**, 124(11), 2245S.
- Vereecken, C. A.; Covents, M.; Matthys, C.; Maes, L. Young adolescents' nutrition assessment on computer (YANA-C). *Eur J Clin Nutr* **2005**, 59, 658-667. DOI: [10.1038/sj.ejcn.1602124](https://doi.org/10.1038/sj.ejcn.1602124).
- Voci, S. M.; Slater, B.; Silva, M. V. D.; Marchioni, D. M. L.; Latorre, M. D. R. D. D. Calibration study of the food frequency questionnaire for adolescents (AFFQ). *Cien Saude Colet* **2011**, 16(4), 2335-2343.

**Table S4.** Risk of bias assessed by Meta Analysis of Statistics Assessment and Review Instrument (MAStARI) critical appraisal tools. Risk of bias was categorized as **High** when the study reaches up to 49% score “yes”, **Moderate** when the study reached 50% to 69% score “yes”, and **Low** when the study reached more than 70% score “yes”.

## 2A- Cohort studies.

| Question                                                                            | Answer                |                               |                     |                 |                    |                        |                    |
|-------------------------------------------------------------------------------------|-----------------------|-------------------------------|---------------------|-----------------|--------------------|------------------------|--------------------|
|                                                                                     | Ambrosini et al.,2014 | Fernandez-Alvira et al., 2015 | Gatica et al., 2012 | Lee et al.,2017 | LioRET et al.,2015 | Northstone et al.,2013 | Camara et al. 2016 |
| 1. Is sample representative of patients in the population as a whole?               | Y                     | N                             | Y                   | N               | N                  | Y                      | N                  |
| 2. Are the patients at a similar point in the course of their condition/illness?    | Y                     | Y                             | Y                   | Y               | Y                  | Y                      | Y                  |
| 3.Has bias been minimized in relation to selection of cases and of controls?        | NA                    | NA                            | NA                  | NA              | NA                 | NA                     | NA                 |
| 4. Are confounding factors identified and strategies to deal with them stated?      | Y                     | Y                             | Y                   | Y               | Y                  | Y                      | Y                  |
| 5. Are outcomes assessed using objective criteria?                                  | Y                     | Y                             | N                   | U               | N                  | N                      | N                  |
| 6. Was follow-up carried out over a sufficient time period?                         | Y                     | Y                             | Y                   | Y               | Y                  | Y                      | Y                  |
| 7. Were the outcomes of people who withdrew described and included in the analysis? | Y                     | Y                             | N                   | Y               | Y                  | N                      | Y                  |
| 8. Were outcomes measured in a reliable way?                                        | N                     | U                             | N                   | N               | N                  | N                      | N                  |
| 9. Was appropriate statistical analysis used?                                       | Y                     | Y                             | Y                   | Y               | Y                  | Y                      | Y                  |
| % yes/risk**                                                                        | 77.7<br>L             | 66.6<br>M                     | 55.5<br>M           | 55.5 M          | 55.5<br>M          | 55.5<br>M              | 55.5<br>M          |

\*Y=Yes, N=No, U=Unclear, NA=Not applicable. \*\*L=low risk, M=moderate risk, H=high risk

## 2B-Cross-sectional studies or longitudinal studies with cross-sectional analysis

| Question                    | Answer                |                        |                      |                    |                      |                     |                    |                     |                    |                    |                     |                    |                        |                        |
|-----------------------------|-----------------------|------------------------|----------------------|--------------------|----------------------|---------------------|--------------------|---------------------|--------------------|--------------------|---------------------|--------------------|------------------------|------------------------|
|                             | Abdullah et al., 2016 | Ambrosini et al., 2009 | Aranceta et al.,2003 | Araujo et al. 2015 | Bibiloni et al.,2011 | Borges et al., 2018 | Craig et al., 2010 | Danyliw et al.,2011 | Durão et al., 2016 | Garba et al., 2014 | Grieger et al.,2011 | Kehoe et al., 2014 | Krusinska et al., 2017 | Leventakou et al.,2015 |
| 1) Was the study based on a | N                     | Y                      | Y                    | Y                  | Y                    | Y                   | N                  | U                   | Y                  | Y                  | Y                   | N                  | N                      | Y                      |

|                                                                                                       |   |   |    |    |    |    |    |    |   |    |    |   |    |   |
|-------------------------------------------------------------------------------------------------------|---|---|----|----|----|----|----|----|---|----|----|---|----|---|
| random or<br>pseudo<br>random sample?                                                                 |   |   |    |    |    |    |    |    |   |    |    |   |    |   |
| 2) Were the<br>criteria for<br>inclusion in the<br>sample clearly<br>defined?                         | Y | N | N  | N  | N  | Y  | N  | Y  | U | N  | N  | Y | Y  | Y |
| 3) Were<br>confounding<br>factors identified<br>and strategies to<br>deal with them<br>stated?        | Y | Y | U  | Y  | Y  | Y  | Y  | N  | Y | N  | Y  | Y | Y  | Y |
| 4) Were outcomes<br>assessed using<br>objective criteria?                                             | Y | N | Y  | N  | N  | Y  | Y  | N  | Y | N  | Y  | N | N  | Y |
| 5) If comparisons<br>are being made,<br>was there<br>sufficient<br>description of the<br>groups?      | N | Y | N  | Y  | Y  | N  | N  | Y  | N | N  | N  | Y | N  | Y |
| 6) Was the follow<br>up carried out<br>over a sufficient<br>time period?                              | Y | Y | Y  | Y  | Y  | Y  | Y  | Y  | Y | Y  | Y  | Y | Y  | Y |
| 7) Were the<br>outcomes of<br>people who<br>withdrew<br>described and<br>included in the<br>analysis? | N | Y | NA | NA | NA | NA | NA | NA | N | NA | NA | N | NA | N |
| 8) Were the<br>outcomes                                                                               | Y | N | Y  | N  | Y  | Y  | Y  | Y  | N | N  | Y  | N | N  | Y |



|                                                                                  |           |           |           |           |           |           |           |          |           |           |           |           |           |
|----------------------------------------------------------------------------------|-----------|-----------|-----------|-----------|-----------|-----------|-----------|----------|-----------|-----------|-----------|-----------|-----------|
| being made, was there sufficient description of the groups?                      |           |           |           |           |           |           |           |          |           |           |           |           |           |
| Was the follow up carried out over a sufficient time period?                     | Y         | Y         | Y         | Y         | Y         | Y         | Y         | Y        | Y         | Y         | Y         | Y         | Y         |
| Were the outcomes of people who withdrew described and included in the analysis? | NA        | NA        | NA        | NA        | NA        | N         | N         | Y        | Y         | N         | NA        | N         | NA        |
| Were the outcomes measured in a reliable way?                                    | N         | U         | N         | N         | Y         | N         | N         | Y        | N         | N         | N         | Y         | N         |
| Was an appropriate statistical analysis used?                                    | Y         | Y         | Y         | Y         | Y         | Y         | Y         | Y        | Y         | Y         | Y         | Y         | Y         |
| % yes/risk                                                                       | 55.5<br>M | 44.4<br>H | 44.4<br>H | 55.5<br>M | 77.7<br>L | 66.6<br>M | 66.6<br>M | 100<br>L | 77.7<br>L | 66.6<br>M | 44.4<br>H | 77.7<br>L | 77.7<br>L |

\*Y=Yes, N=No, U=Unclear, NA=Not applicable. \*\*L=low risk, M=moderate risk, H=high risk

## 2B-Cross-sectional studies or longitudinal studies with cross-sectional analysis

| Question                                                                     | Shang et al.,<br>2012 | Silva et al.,<br>2012 | Smith et al.,<br>2011 | Villa et al.,<br>2015 | Wall et al.,<br>2013 | Wu et al.,<br>2017 |
|------------------------------------------------------------------------------|-----------------------|-----------------------|-----------------------|-----------------------|----------------------|--------------------|
| Was the study based on a random or pseudo random sample?                     | Y                     | N                     | Y                     | Y                     | N                    | Y                  |
| Were the criteria for inclusion in the sample clearly defined?               | N                     | N                     | Y                     | Y                     | Y                    | Y                  |
| Were confounding factors identified and strategies to deal with them stated? | N                     | Y                     | Y                     | Y                     | Y                    | Y                  |
| Were outcomes assessed using objective criteria?                             | Y                     | N                     | N                     | Y                     | N                    | N                  |

|                                                                                  |      |      |      |      |      |      |
|----------------------------------------------------------------------------------|------|------|------|------|------|------|
| If comparisons are being made, was there sufficient description of the groups?   | Y    | Y    | Y    | Y    | N    | Y    |
| Was the follow up carried out over a sufficient time period?                     | Y    | Y    | Y    | Y    | Y    | Y    |
| Were the outcomes of people who withdrew described and included in the analysis? | NA   | NA   | Y    | NA   | N    | N    |
| Were the outcomes measured in a reliable way?                                    | Y    | U    | N    | Y    | N    | N    |
| Was an appropriate statistical analysis used?                                    | N    | Y    | Y    | Y    | Y    | Y    |
| % yes/risk                                                                       | 55.5 | 44.4 | 77.7 | 88.8 | 44.4 | 66.6 |
|                                                                                  | M    | H    | L    | L    | H    | M    |

\*Y=Yes, N=No, U=Unclear, NA=Not applicable. \*\*L=low risk, M=moderate risk, H=high risk
